# Supplementary material
Source: PubMed Central journal article supplement (PMC2860233)
Supplement: supp_M900234-MCP200_Supplemental_Figures.pdf [file supp_M900234-MCP200_Supplemental_Figures.pdf]

# Supplemental Figure S1A

Peak ID: 1740

MS/MS Fragmentation of **SVLGQLGITK**

Found in **gi|24438**, alpha-1-antitrypsin (aa 268-394) [Homo sapiens]

Match to Query 6: 1014.645800 from(508.330176,2+)

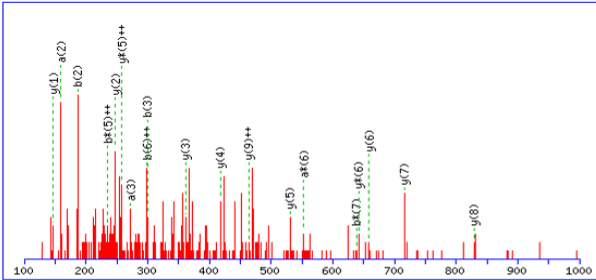

Monoisotopic mass of neutral peptide Mr(calc): 1014.6073

Ions Score: 15 Expect: 47

Matches (**Bold**): 19/92 fragment ions using 81 most intense peaks

| #  | a               | a <sup>++</sup> | a <sup>*</sup>  | a <sup>+++</sup> | b               | b <sup>++</sup> | b <sup>*</sup>  | b <sup>+++</sup> | Seq. | y               | y <sup>++</sup> | y <sup>*</sup>  | y <sup>+++</sup> | #  |
|----|-----------------|-----------------|-----------------|------------------|-----------------|-----------------|-----------------|------------------|------|-----------------|-----------------|-----------------|------------------|----|
| 1  | 60.0444         | 30.5258         |                 |                  | 88.0393         | 44.5233         |                 |                  | S    |                 |                 |                 |                  | 10 |
| 2  | <b>159.1128</b> | 80.0600         |                 |                  | <b>187.1077</b> | 94.0575         |                 |                  | V    | 928.5826        | <b>464.7949</b> | 911.5560        | 456.2817         | 9  |
| 3  | <b>272.1969</b> | 136.6021        |                 |                  | <b>300.1918</b> | 150.5995        |                 |                  | L    | <b>829.5142</b> | 415.2607        | 812.4876        | 406.7475         | 8  |
| 4  | 329.2183        | 165.1128        |                 |                  | 357.2132        | 179.1103        |                 |                  | G    | <b>716.4301</b> | 358.7187        | 699.4036        | 350.2054         | 7  |
| 5  | 457.2769        | 229.1421        | 440.2504        | 220.6288         | 485.2718        | 243.1395        | 468.2453        | <b>234.6263</b>  | Q    | <b>659.4087</b> | 330.2080        | <b>642.3821</b> | 321.6947         | 6  |
| 6  | 570.3610        | 285.6841        | <b>553.3344</b> | 277.1709         | 598.3559        | <b>299.6816</b> | 581.3293        | 291.1683         | L    | <b>531.3501</b> | 266.1787        | 514.3235        | <b>257.6654</b>  | 5  |
| 7  | 627.3824        | 314.1949        | 610.3559        | 305.6816         | 655.3774        | 328.1923        | <b>638.3508</b> | 319.6790         | G    | <b>418.2660</b> | 209.6366        | 401.2395        | 201.1234         | 4  |
| 8  | 740.4665        | 370.7369        | 723.4400        | 362.2236         | 768.4614        | 384.7343        | 751.4349        | 376.2211         | I    | <b>361.2445</b> | 181.1259        | 344.2180        | 172.6126         | 3  |
| 9  | 841.5142        | 421.2607        | 824.4876        | 412.7475         | 869.5091        | 435.2582        | 852.4825        | 426.7449         | T    | <b>248.1605</b> | 124.5839        | 231.1339        | 116.0706         | 2  |
| 10 |                 |                 |                 |                  |                 |                 |                 |                  | K    | <b>147.1128</b> | 74.0600         | 130.0863        | 65.5468          | 1  |

Matched peptides shown in **Bold Red**

1 THDIITKFLE NEDRRSASLH LPKLSITGTY DLK**SVLGQLG** ITKVFSNGAD  
 51 LSGVTEEAPL KLSKAVHKAV LTIDEKGTGA AGAMFLEAIP MSIPPEVKFN  
 101 KPFVFLMIEQ NTKSPLFMGK VVNPTQK

# Supplemental Figure S1B

Peak ID: 11165

MS/MS Fragmentation of **HPNSPLDEENLTQENQDR**  
 Found in **gj|443345**, Chain A, Alpha1 Antichymotrypsin  
 Match to Query 2: 2134.980774 from(712.667534,3+)

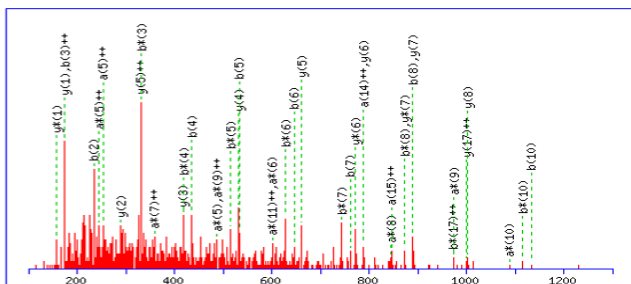

Monoisotopic mass of neutral peptide Mr(calc): 2134.9515  
 Ions Score: 28 Expect: 0.93  
 Matches (**Bold**): 41/196 fragment ions using 64 most intense peaks

| #  | a         | a <sup>++</sup> | a <sup>+</sup>   | a <sup>+++</sup> | b                | b <sup>++</sup> | b <sup>*</sup>   | b <sup>+++</sup> | Seq.     | y                | y <sup>++</sup> | y <sup>+</sup>  | y <sup>+++</sup> | #         |
|----|-----------|-----------------|------------------|------------------|------------------|-----------------|------------------|------------------|----------|------------------|-----------------|-----------------|------------------|-----------|
| 1  | 110.0713  | 55.5393         |                  |                  | 138.0662         | 69.5367         |                  |                  | <b>H</b> |                  |                 |                 |                  | <b>18</b> |
| 2  | 207.1240  | 104.0657        |                  |                  | <b>235.1190</b>  | 118.0631        |                  |                  | <b>P</b> | 1998.8999        | <b>999.9536</b> | 1981.8734       | 991.4403         | <b>17</b> |
| 3  | 321.1670  | 161.0871        | 304.1404         | 152.5738         | 349.1619         | <b>175.0846</b> | <b>332.1353</b>  | 166.5713         | <b>N</b> | 1901.8472        | 951.4272        | 1884.8206       | 942.9139         | <b>16</b> |
| 4  | 408.1990  | 204.6031        | 391.1724         | 196.0899         | <b>436.1939</b>  | 218.6006        | <b>419.1674</b>  | 210.0873         | <b>S</b> | 1787.8042        | 894.4058        | 1770.7777       | 885.8925         | <b>15</b> |
| 5  | 505.2518  | <b>253.1295</b> | <b>488.2252</b>  | <b>244.6162</b>  | <b>533.2467</b>  | 267.1270        | <b>516.2201</b>  | 258.6137         | <b>P</b> | 1700.7722        | 850.8897        | 1683.7456       | 842.3765         | <b>14</b> |
| 6  | 618.3358  | 309.6715        | <b>601.3093</b>  | 301.1583         | <b>646.3307</b>  | 323.6690        | <b>629.3042</b>  | 315.1557         | <b>L</b> | 1603.7194        | 802.3634        | 1586.6929       | 793.8501         | <b>13</b> |
| 7  | 733.3628  | 367.1850        | 716.3362         | <b>358.6717</b>  | <b>761.3577</b>  | 381.1825        | <b>744.3311</b>  | 372.6692         | <b>D</b> | 1490.6354        | 745.8213        | 1473.6088       | 737.3080         | <b>12</b> |
| 8  | 862.4054  | 431.7063        | <b>845.3788</b>  | 423.1930         | <b>890.4003</b>  | 445.7038        | <b>873.3737</b>  | 437.1905         | <b>E</b> | 1375.6084        | 688.3079        | 1358.5819       | 679.7946         | <b>11</b> |
| 9  | 991.4479  | 496.2276        | <b>974.4214</b>  | <b>487.7143</b>  | 1019.4429        | 510.2251        | 1002.4163        | 501.7118         | <b>E</b> | 1246.5658        | 623.7866        | 1229.5393       | 615.2733         | <b>10</b> |
| 10 | 1105.4909 | 553.2491        | <b>1088.4643</b> | 544.7358         | <b>1133.4858</b> | 567.2465        | <b>1116.4592</b> | 558.7333         | <b>N</b> | 1117.5232        | 559.2653        | 1100.4967       | 550.7520         | <b>9</b>  |
| 11 | 1218.5749 | 609.7911        | 1201.5484        | <b>601.2778</b>  | 1246.5699        | 623.7886        | 1229.5433        | 615.2753         | <b>L</b> | <b>1003.4803</b> | 502.2438        | 986.4538        | 493.7305         | <b>8</b>  |
| 12 | 1319.6226 | 660.3149        | 1302.5961        | 651.8017         | 1347.6175        | 674.3124        | 1330.5910        | 665.7991         | <b>T</b> | <b>890.3963</b>  | 445.7018        | <b>873.3697</b> | 437.1885         | <b>7</b>  |
| 13 | 1447.6812 | 724.3442        | 1430.6546        | 715.8310         | 1475.6761        | 738.3417        | 1458.6496        | 729.8284         | <b>Q</b> | <b>789.3486</b>  | 395.1779        | <b>772.3220</b> | 386.6646         | <b>6</b>  |
| 14 | 1576.7238 | <b>788.8655</b> | 1559.6972        | 780.3523         | 1604.7187        | 802.8630        | 1587.6922        | 794.3497         | <b>E</b> | <b>661.2900</b>  | <b>331.1486</b> | 644.2634        | 322.6354         | <b>5</b>  |
| 15 | 1690.7667 | <b>845.8870</b> | 1673.7402        | 837.3737         | 1718.7616        | 859.8845        | 1701.7351        | 851.3712         | <b>N</b> | <b>532.2474</b>  | 266.6273        | 515.2209        | 258.1141         | <b>4</b>  |
| 16 | 1818.8253 | 909.9163        | 1801.7987        | 901.4030         | 1846.8202        | 923.9137        | 1829.7937        | 915.4005         | <b>Q</b> | <b>418.2045</b>  | 209.6059        | 401.1779        | 201.0926         | <b>3</b>  |
| 17 | 1933.8522 | 967.4298        | 1916.8257        | 958.9165         | 1961.8472        | 981.4272        | 1944.8206        | <b>972.9139</b>  | <b>D</b> | <b>290.1459</b>  | 145.5766        | 273.1193        | 137.0633         | <b>2</b>  |
| 18 |           |                 |                  |                  |                  |                 |                  |                  | <b>R</b> | <b>175.1190</b>  | 88.0631         | <b>158.0924</b> | 79.5498          | <b>1</b>  |

Matched peptides shown in **Bold Red**

**1 HPNSPLDEEN LTQENQDRGT** HVDLGLASAN VDFAFSLYKQ LVLKAPDKNV  
**51 IFSPLSISTA** LAFLSLGAHN TTLTEILKGL KFNLTETSEA EIHQSFQHLL  
**101 RTLNQSSDEL** QLMSGNAMFV KEQLSLLDRF TEDAKRLYGS EAFATDFQDS  
**151 AAAKKLINDY** VKNGTRGKIT DLIKDLDSQT MMVLVNYIFF KAKWEMPFDP  
**201 QDTHQSRFYL** SKKKWVMVPM MSLHHLTIPY FRDEELSCV VELKYTGNAS  
**251 ALFILPDQDK** MEEVEAMLLP ETLKRWRDSL EFREIGELYL PKFSISRDN  
**301 LNDILLQLGI** EEAFYSKADL SGITGARNLA VSQVVKAVL DVFEEGTEAS  
**351 AATAVKITLL**

# Supplemental Figure S2

## A

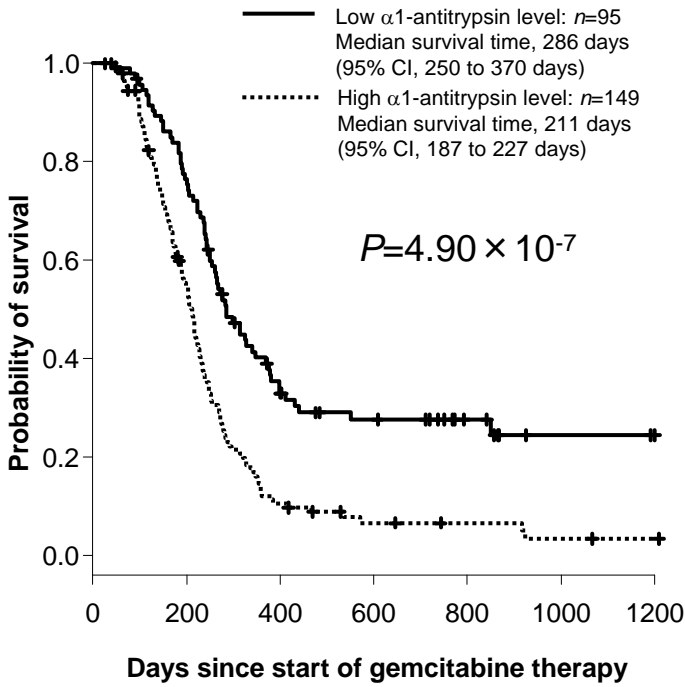

## B

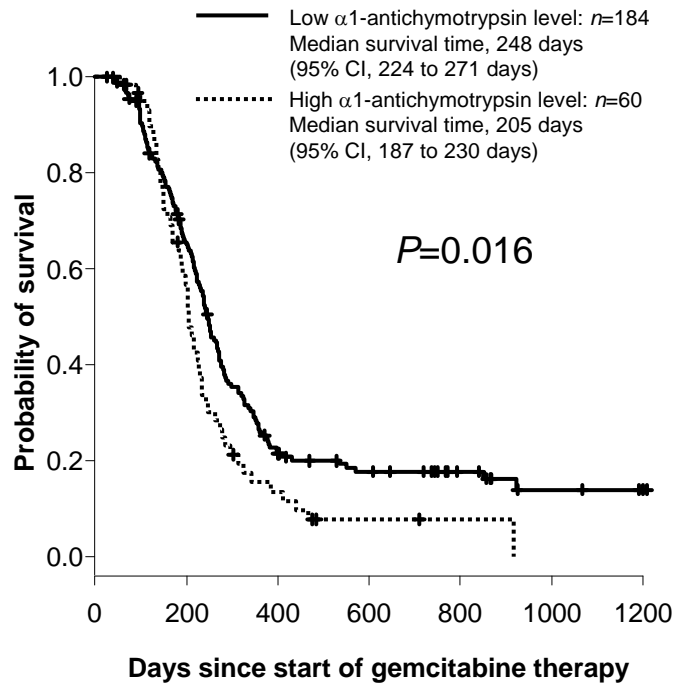

## C

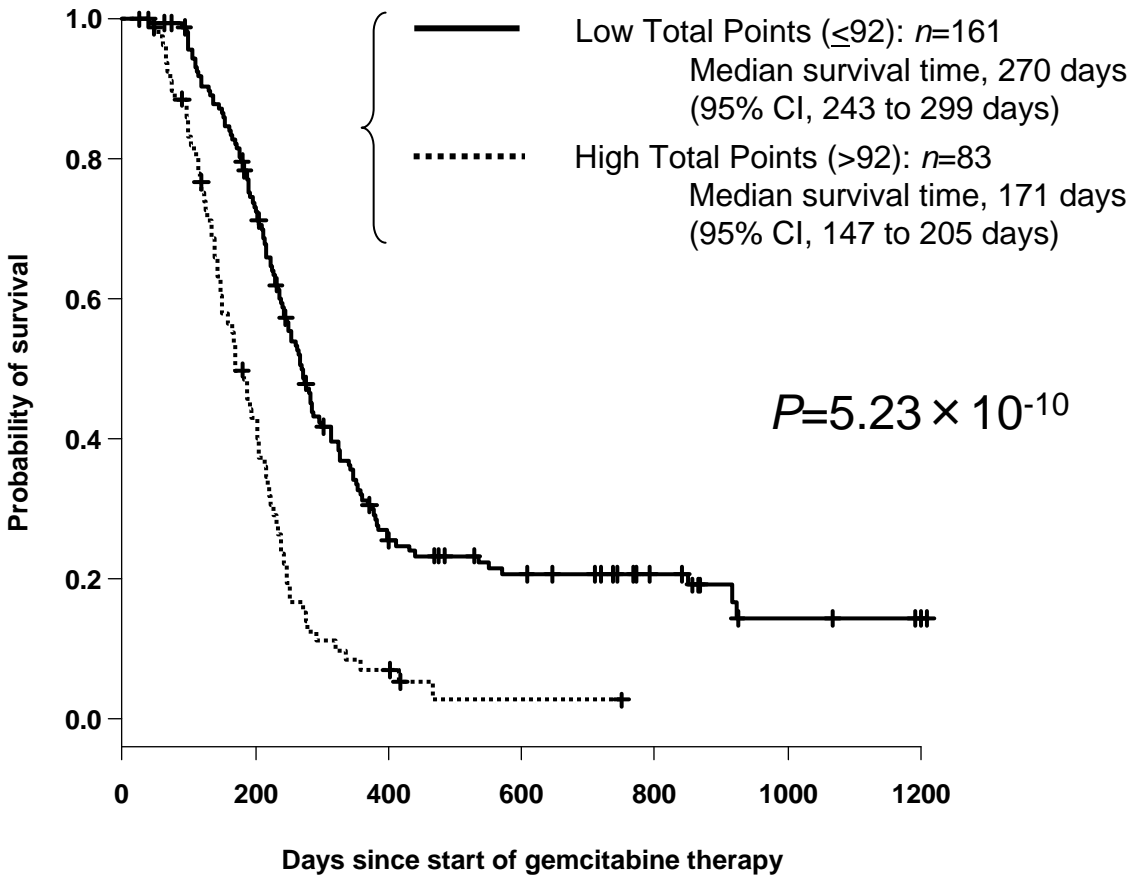

# Supplemental Figure S3

**A**

$\alpha$ 1-Antitrypsin

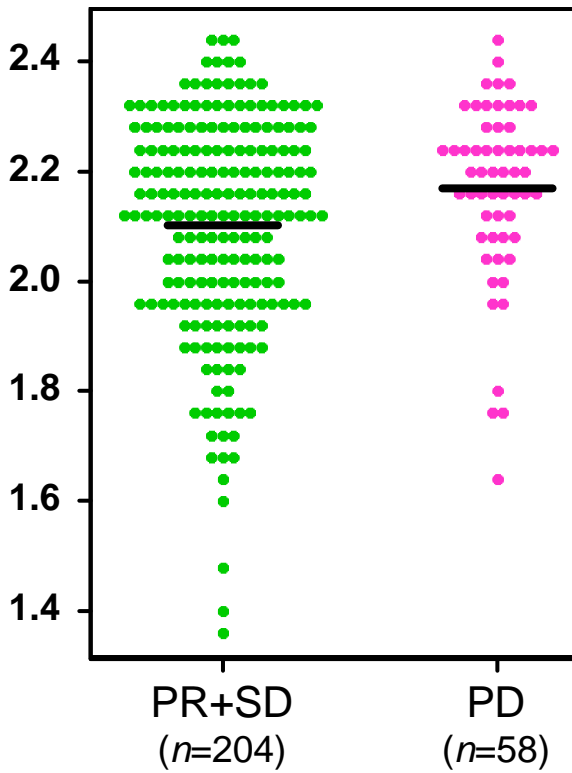

$P=0.020$

**B**

$\alpha$ 1-Antichymotrypsin

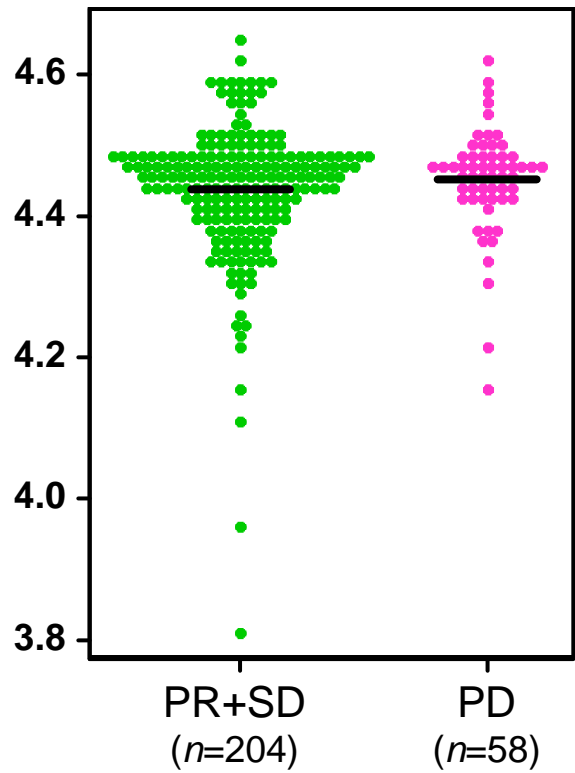

$P=0.312$

# Supplemental Figure S4

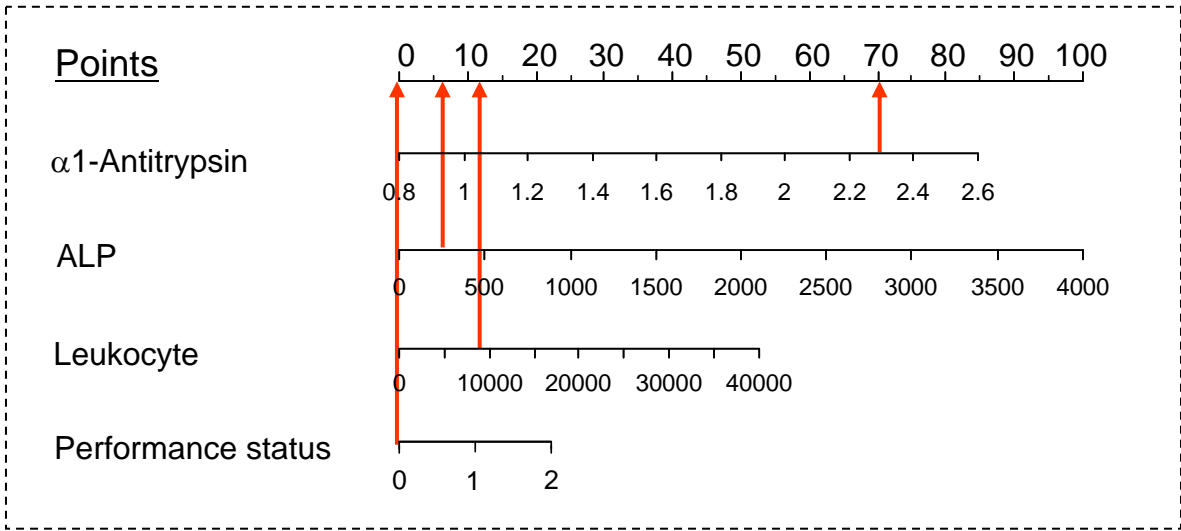

## Total Points

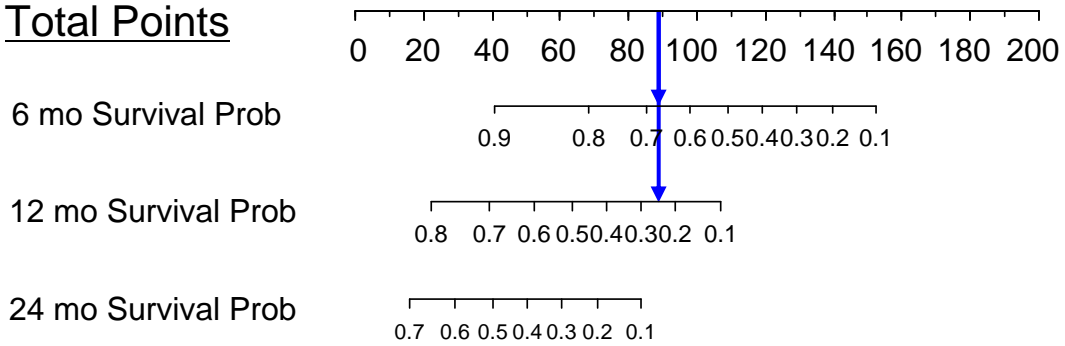

## LEGENDS FOR SUPPLEMENTAL FIGURES ONLINE

### Supplemental Figure S1 online

MS/MS spectra and database search results of two representative MS peaks [ID 1740 (A) and ID 11165 (B)] identified as being derived from  $\alpha$ 1-antitrypsin and  $\alpha$ 1-antichymotrypsin, respectively. Peptides that matched the amino acid sequences in the database are highlighted in red.

### Supplemental Figure S2 online

Kaplan-Meier plots of overall survival in relation to  $\alpha$ 1-antitrypsin (A),  $\alpha$ 1-antichymotrypsin (B) data, and Total Point score (C) in 244 samples that were not used in the 2DICAL analysis.

### Supplemental Figure S3 online

Plasma/serum levels of  $\alpha$ 1-antitrypsin and  $\alpha$ 1-antichymotrypsin according to tumor response (RECIST guideline). Horizontal lines represent the average levels. Forty-two patients whose tumor response was not evaluable were excluded. PR, partial response; SD, stable disease; PD, progressive disease.

### Supplemental Figure S4 online

First, draw a vertical line (*red*) upward to the Points row (*top*) to obtain the number of points for each variable (*top*). Then, total the points and drop a vertical line (*blue*) from the Total Points row to obtain the estimated probability (Prob) of survival 6, 12, and 24 months (mo) after gemcitabine treatment (*bottom*). This particular patient was estimated to have no chance of surviving more than 24 months using the current gemcitabine treatment.
