# Supplementary material
Source: PubMed Central journal article supplement (PMC2860233)
Supplement: supp_M900234-MCP200_Supplemental_Table_S1.pdf [file supp_M900234-MCP200_Supplemental_Table_S1.pdf]

**Supplemental Table S1. Clinical and Laboratory Data for All Patients (N=304)**

|                                                | No. of patients | %   |
|------------------------------------------------|-----------------|-----|
| <b>All</b>                                     | 304             | 100 |
| Sex                                            |                 |     |
| Male                                           | 182             | 60  |
| Female                                         | 122             | 40  |
| Age, years                                     |                 |     |
| mean (SD)                                      | 64 (9)          |     |
| >65                                            | 137             | 45  |
| ≤65                                            | 167             | 55  |
| ECOG performance status                        |                 |     |
| 0                                              | 138             | 45  |
| 1                                              | 140             | 46  |
| 2                                              | 26              | 9   |
| Body surface area, m <sup>2</sup>              |                 |     |
| mean (SD)                                      | 1.54 (0.17)     |     |
| Prior therapy                                  |                 |     |
| None                                           | 281             | 92  |
| CRT using 5-FU for LAPC                        | 23              | 8   |
| Clinical Stage*                                |                 |     |
| IVa                                            | 19              | 6   |
| IVb                                            | 285             | 94  |
| Subsequent-line chemotherapy after gemcitabine |                 |     |
| None                                           | 261             | 86  |
| S-1 alone                                      | 24              | 8   |
| Gemcitabine+S-1                                | 8               | 3   |
| 5-FU                                           | 6               | 2   |
| Others                                         | 5               | 2   |
| Leukocyte, x10 <sup>3</sup> /mm <sup>3</sup>   |                 |     |
| mean (SD)                                      | 6.2 (3.0)       |     |
| >6.1 (ULN)                                     | 120             | 39  |
| ≤6.1                                           | 184             | 61  |
| Platelet, x10 <sup>4</sup> /mm <sup>3</sup>    |                 |     |
| mean (SD)                                      | 22.3 (7.2)      |     |
| >13.1                                          | 278             | 91  |
| ≤13.1 (LLN)                                    | 26              | 9   |
| Hemoglobin, g/dL                               |                 |     |
| mean (SD)                                      | 11.9 (1.5)      |     |
| >11                                            | 226             | 74  |
| ≤11                                            | 78              | 26  |
| Albumin, g/dL                                  |                 |     |
| mean (SD)                                      | 3.6 (0.4)       |     |
| >3.7                                           | 122             | 40  |
| ≤3.7 (LLN)                                     | 182             | 60  |
| Creatinine, mg/dL                              |                 |     |
| mean (SD)                                      | 0.68 (0.19)     |     |
| >1.1 (ULN)                                     | 8               | 3   |
| ≤1.1                                           | 296             | 97  |
| AST, IU/L                                      |                 |     |
| mean (SD)                                      | 33 (23)         |     |
| >33 (ULN)                                      | 93              | 31  |
| ≤33                                            | 211             | 69  |
| ALT, IU/L                                      |                 |     |
| mean (SD)                                      | 39 (40)         |     |
| >42 (ULN)                                      | 81              | 27  |
| ≤42                                            | 223             | 73  |
| ALP, U/L                                       |                 |     |
| mean (SD)                                      | 477 (450)       |     |
| >360 (ULN)                                     | 128             | 42  |
| ≤360                                           | 176             | 58  |
| Tumor response <sup>†</sup>                    |                 |     |
| Complete response                              | 0               | 0   |
| Partial response                               | 18              | 6   |
| Stable disease                                 | 186             | 61  |
| Progressive disease                            | 58              | 19  |
| Not evaluable                                  | 42              | 14  |

\*According to Classification of Pancreatic Carcinoma (Japan Pancreas Society, 2003).

†Evaluated after the first two cycles of gemcitabine monotherapy.

Abbreviations: SD, standard deviation; ECOG, Eastern Cooperative Oncology Group; CRT, chemoradiotherapy; 5-FU, 5-fluorouracil; LAPC, locally advanced pancreatic cancer; ULN, upper limit of normal; LLN, lower limit of normal; AST, aspartate aminotransferase; ALT, alanine aminotransferase; ALP, alkaline phosphatase.
